# Supplementary material for: Radiomics based on fluoro-deoxyglucose positron emission tomography predicts liver fibrosis in biopsy-proven MAFLD: a pilot study
Source: PubMed Central journal article supplement (PMC8579290; doi:10.7150/ijms.64458), 2021-09-07
Supplement: ijmsv18p3624s1.pdf [file ijmsv18p3624s1.pdf]

**Table S1. The extracted radiomics features**

|                     |                                                                                                                                                |
|---------------------|------------------------------------------------------------------------------------------------------------------------------------------------|
| Conventional (n=11) | SUVbwmin<br>SUVbwmean<br>SUVbwstd<br>SUVbwmax<br>SUVbwQ1<br>SUVbwQ2<br>SUVbwQ3<br>SUVbwSkewness<br>SUVbwKurtosis<br>SUVbwExcessKurtosis<br>TLG |
| Discretized (n=11)  | SUVbwmin<br>SUVbwmean<br>SUVbwstd<br>SUVbwmax<br>SUVbwQ1<br>SUVbwQ2<br>SUVbwQ3<br>SUVbwSkewness<br>SUVbwKurtosis<br>SUVbwExcessKurtosis<br>TLG |
| Histogram (n=6)     | Skewness<br>Kurtosis<br>ExcessKurtosis<br>Entropy_log10<br>Entropy_log2<br>Energy                                                              |
| GLCM (n=7)          | Homogeneity<br>Energy<br>Contrast<br>Correlation<br>Entropy_log10<br>Entropy_log2<br>Dissimilarity                                             |
| GLRLM (n=11)        | SRE<br>LRE<br>LGRE<br>HGRE<br>SRLGE<br>SRHGE<br>LRLGE<br>LRHGE                                                                                 |

|              |                                                                                      |
|--------------|--------------------------------------------------------------------------------------|
|              | GLNU<br>RLNU<br>RP                                                                   |
| NGLDM (n=3)  | Coarseness<br>Contrast<br>Busyness                                                   |
| GLZLM (n=11) | SZE<br>LZE<br>LGZE<br>HGZE<br>SZLGE<br>SZHGE<br>LZLGE<br>LZHGE<br>GLNU<br>ZLNU<br>ZP |

Detailed explanations and equations for the radiomic features were listed in the website:

[https://www.lifexsoft.org/index.php/resources/19-texture/radiomic-features?filter\\_tag\[0\]=](https://www.lifexsoft.org/index.php/resources/19-texture/radiomic-features?filter_tag[0]=)

Abbreviations: SUV: standardized uptake value; TLG: total lesion glycolysis; GLCM: grey-level co-occurrence matrix; GLRLM: grey-level run length matrix; NGLDM: neighborhood grey-level difference matrix; GLZLM: grey-level zone length matrix; SRE: short-run emphasis; LRE: long-run emphasis; LGRE: low gray-level run emphasis; HGRE: high gray-level run emphasis; SRLGE: short-run low gray-level emphasis; SRHGE: short-run high gray-level emphasis; LRLGE: long-run low gray-level emphasis; LRLHGE: long-run high gray-level emphasis; GLNU: gray-level non-uniformity; RLNU: run length non-uniformity; RP: run percentage; SZE: short-zone emphasis; LZE: Long-Zone Emphasis; LGZE: low gray-level zone emphasis; HGZE: high gray-level zone emphasis; SZLGE: short-zone low gray-level emphasis; SZHGE: short-zone high gray-level emphasis; LZLGE: long-zone low gray-level emphasis; LZHGE: long-zone high gray-level emphasis; GLNU: gray-level non-uniformity; ZLNU: zone length non-uniformity; ZP: zone percentage.
